# Supplementary material for: Mitigating the P2–O2 transition and Na+/vacancy ordering in Na2/3Ni1/3Mn2/3O2 by anion/cation dual-doping for fast and stable Na+ insertion/extraction
Source: Royal Society of Chemistry journal article supplement (doi:10.1039/d1ta01433a), 2021-01-01
Supplement: d1ta01433a1.pdf [file d1ta01433a1.pdf]

## Supporting Information

**Mitigating P2-O2 Transition and Na<sup>+</sup>/Vacancy Ordering in Na<sub>2/3</sub>Ni<sub>1/3</sub>Mn<sub>2/3</sub>O<sub>2</sub> by**

**Anion/Cation Dual-Doping for Fast and Stable Na<sup>+</sup> Insertion/Extraction**

Qianjiang Mao,<sup>ab</sup> Yang Yu<sup>a</sup>, Junkai Wang,<sup>a</sup> Lirong Zheng,<sup>c</sup> Zhenya Wang,<sup>a</sup> Yunsheng Qiu,<sup>a</sup>

Yongmei Hao<sup>\*b</sup> and Xiangfeng Liu<sup>\*ad</sup>

<sup>a</sup> Center of Materials Science and Optoelectronics Engineering, College of Materials Science and Optoelectronic Technology, University of Chinese Academy of Sciences, Beijing, 100049, China

<sup>b</sup> School of Chemical Sciences, University of Chinese Academy of Sciences, Beijing, 100049,

China

<sup>c</sup> Institute of High Energy Physics, Chinese Academy of Sciences, Beijing, 100049, China

<sup>d</sup> CAS Center for Excellence in Topological Quantum Computation, University of Chinese

Academy of Sciences, Beijing 100190, China

\* Corresponding author.

E-mail address: liuxf@ucas.ac.cn (X.L.); ymhao@ucas.ac.cn (Y.H.)

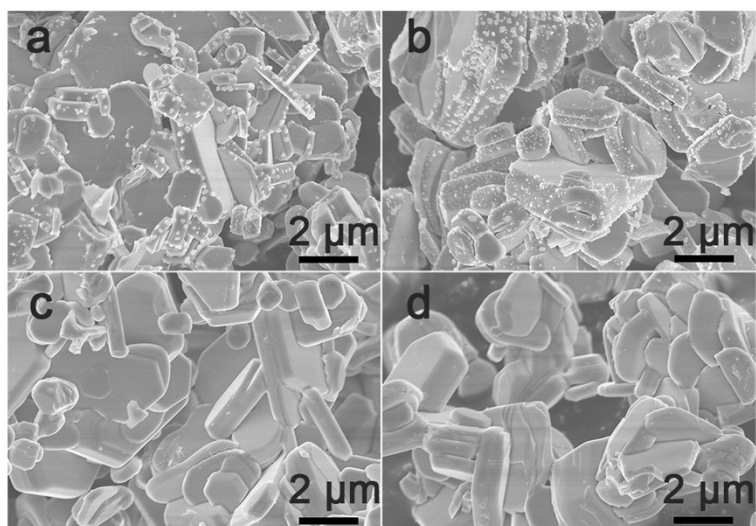

**Fig. S1** SEM images of  $\text{Na}_{0.67-x}\text{Ca}_x\text{Ni}_{0.33}\text{Mn}_{0.67}\text{O}_{2-2x}\text{F}_{2x}$  samples (a)  $x = 0$ , (b)  $x = 0.01$ , (c)  $x = 0.03$  and (d)  $x = 0.05$ .

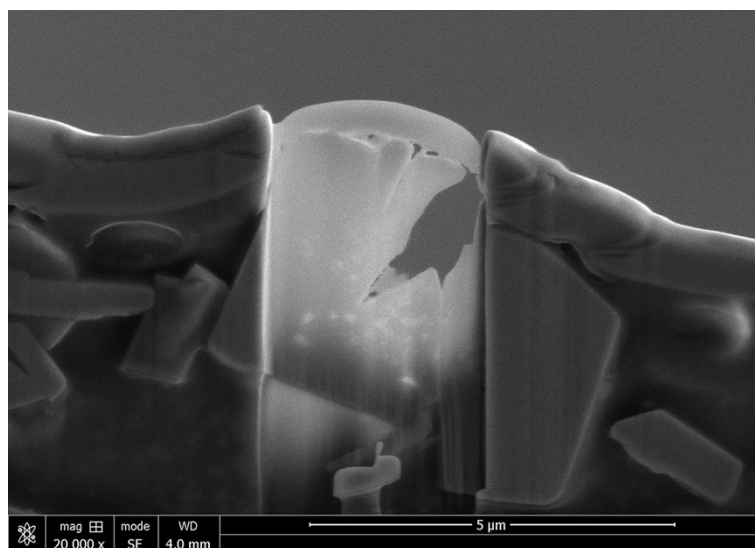

**Fig. S2** FIB-cut image of TEM specimen.

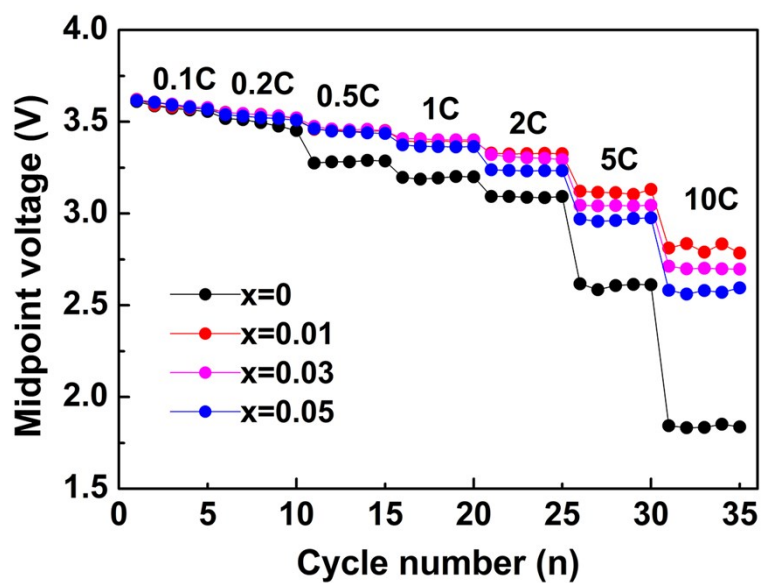

**Fig. S3** Midpoint voltage of  $\text{Na}_{0.67-x}\text{Ca}_x\text{Ni}_{0.33}\text{Mn}_{0.67}\text{O}_{2-2x}\text{F}_{2x}$  ( $x = 0, 0.01, 0.03$  and  $0.05$ ) at various current densities.

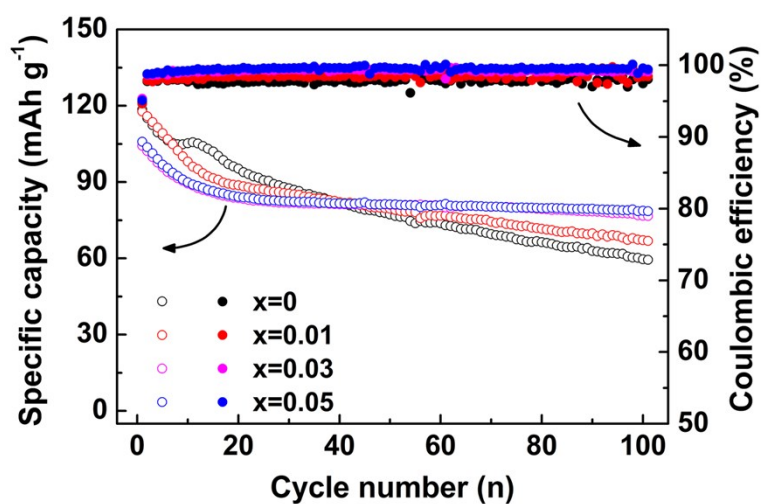

**Fig. S4** Cycling performance of  $\text{Na}_{0.67-x}\text{Ca}_x\text{Ni}_{0.33}\text{Mn}_{0.67}\text{O}_{2-2x}\text{F}_{2x}$  ( $x = 0, 0.01, 0.03$  and  $0.05$ ) cycled at 0.2C in the voltage range of 2.0-4.3 V.

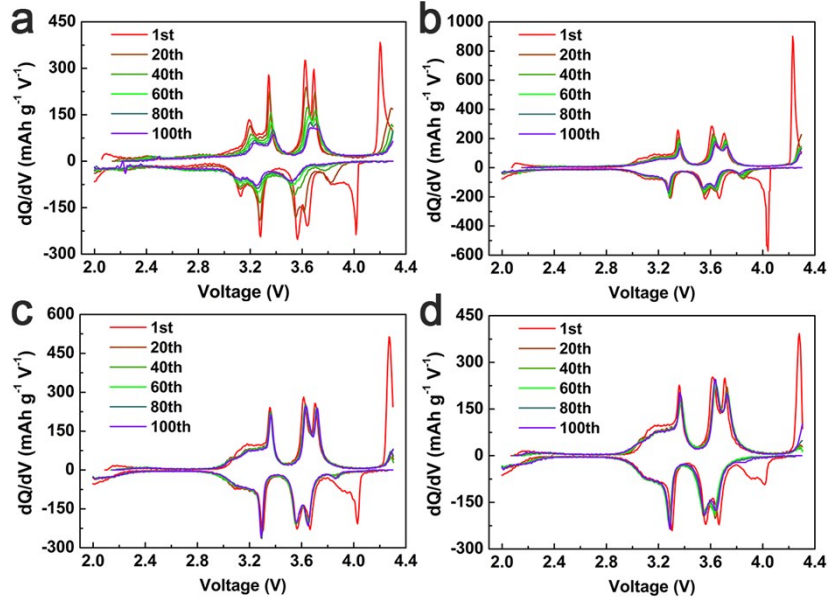

**Fig. S5** The  $dQ/dV$  plots of  $\text{Na}_{0.67-x}\text{Ca}_x\text{Ni}_{0.33}\text{Mn}_{0.67}\text{O}_{2-2x}\text{F}_{2x}$  (a)  $x = 0$ , (b)  $x = 0.01$ , (c)  $x = 0.03$  and (d)  $x = 0.05$  at 0.2C.

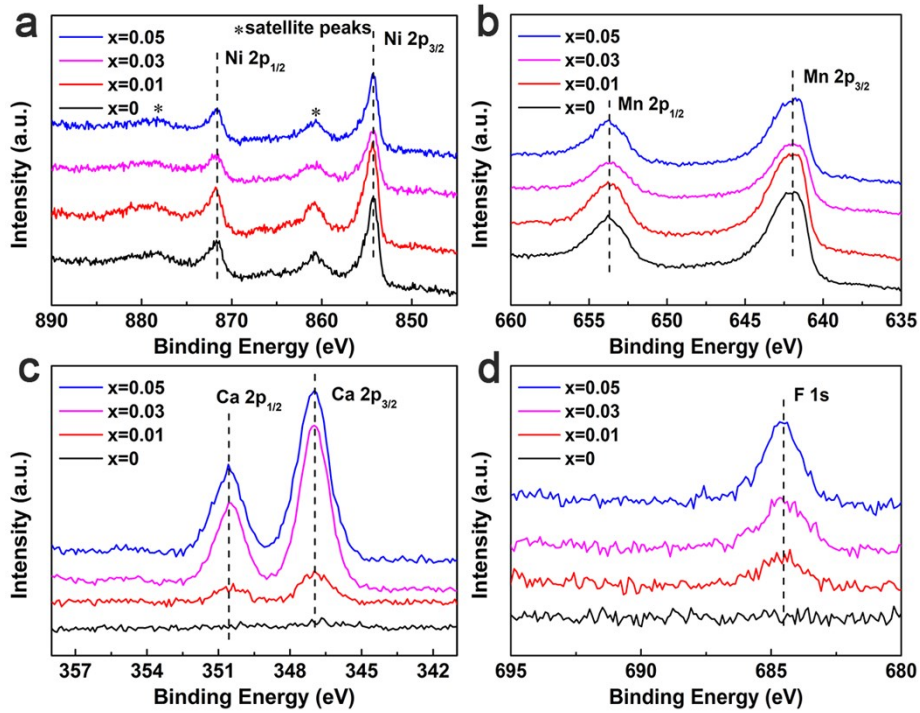

**Fig. S6** XPS spectra of  $\text{Na}_{0.67-x}\text{Ca}_x\text{Ni}_{0.33}\text{Mn}_{0.67}\text{O}_{2-2x}\text{F}_{2x}$  ( $x = 0, 0.01, 0.03$  and  $0.05$ ) powders for (a) Ni 2p, (b) Mn 2p, (c) Ca 2p and (d) F 1s.

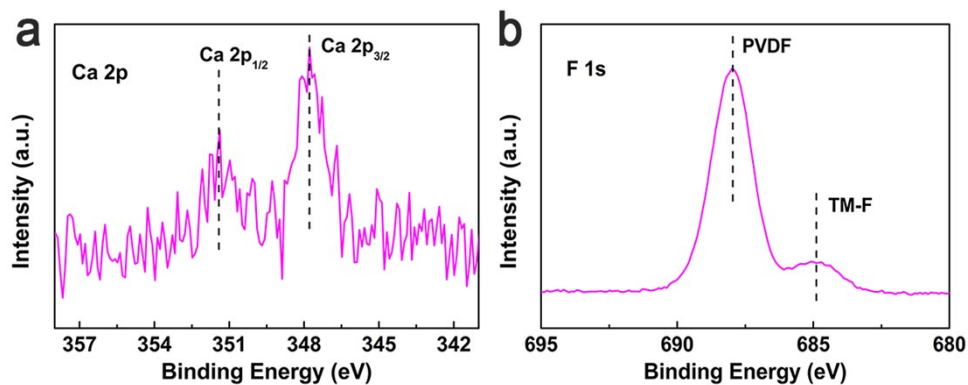

**Fig. S7** XPS spectra of  $\text{Na}_{0.67-x}\text{Ca}_x\text{Ni}_{0.33}\text{Mn}_{0.67}\text{O}_{2-2x}\text{F}_{2x}$  ( $x = 0.03$ ) cathode charged to 4.3 V for (a) Ca 2p and (b) F 1s.

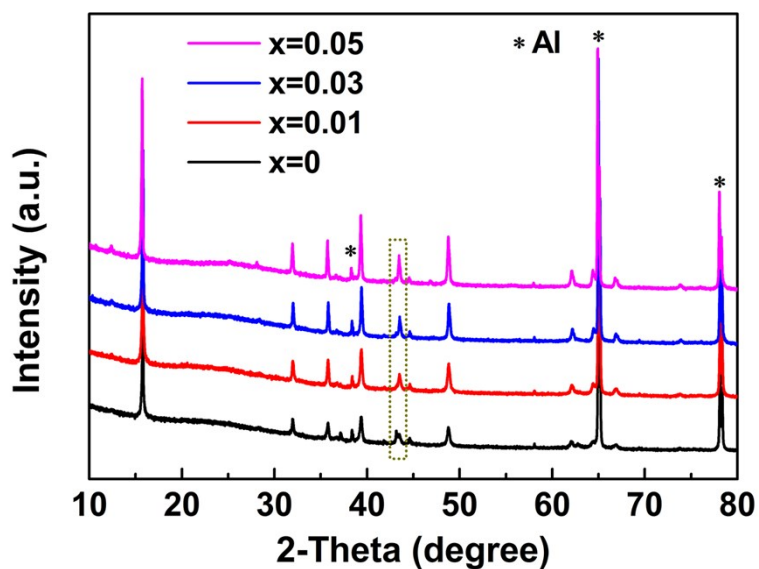

**Fig. S8** Comparison of XRD patterns of  $\text{Na}_{0.67-x}\text{Ca}_x\text{Ni}_{0.33}\text{Mn}_{0.67}\text{O}_{2-2x}\text{F}_{2x}$  ( $x = 0, 0.01, 0.03$  and  $0.05$ ) after 100 cycles at 0.2C.

**Table S1.** Crystallographic parameters of  $\text{Na}_{0.67-x}\text{Ca}_x\text{Ni}_{0.33}\text{Mn}_{0.67}\text{O}_{2-2x}\text{F}_{2x}$  ( $x = 0$ ) refined by the Rietveld method.

| Site                                                                                                                 | x      | y      | z      | occ.   |
|----------------------------------------------------------------------------------------------------------------------|--------|--------|--------|--------|
| Na <sub>f</sub>                                                                                                      | 0      | 0      | 0.25   | 0.3016 |
| Na <sub>e</sub>                                                                                                      | 0.3333 | 0.6667 | 0.75   | 0.3684 |
| Ni                                                                                                                   | 0      | 0      | 0      | 0.3260 |
| Mn                                                                                                                   | 0      | 0      | 0      | 0.6740 |
| O                                                                                                                    | 0.3333 | 0.6667 | 0.0890 | 1.0000 |
| $a = 2.886(5) \text{ \AA}$ $c = 11.151(3) \text{ \AA}$ $V = 80.45(3) \text{ \AA}^3$ $R_p = 4.96\%$ $R_{wp} = 6.55\%$ |        |        |        |        |

**Table S2.** Crystallographic parameters of  $\text{Na}_{0.67-x}\text{Ca}_x\text{Ni}_{0.33}\text{Mn}_{0.67}\text{O}_{2-2x}\text{F}_{2x}$  ( $x = 0.03$ ) refined by the Rietveld method.

| Site                                                                                                                 | x      | y      | z      | occ.   |
|----------------------------------------------------------------------------------------------------------------------|--------|--------|--------|--------|
| Na <sub>f</sub>                                                                                                      | 0      | 0      | 0.25   | 0.2427 |
| Na <sub>e</sub>                                                                                                      | 0.3333 | 0.6667 | 0.75   | 0.3981 |
| Ca <sub>e</sub>                                                                                                      | 0.3333 | 0.6667 | 0.75   | 0.0292 |
| Ni                                                                                                                   | 0      | 0      | 0      | 0.3204 |
| Mn                                                                                                                   | 0      | 0      | 0      | 0.6796 |
| O                                                                                                                    | 0.3333 | 0.6667 | 0.0886 | 0.9400 |
| F                                                                                                                    | 0.3333 | 0.6667 | 0.0886 | 0.0600 |
| $a = 2.885(3) \text{ \AA}$ $c = 11.137(5) \text{ \AA}$ $V = 80.31(3) \text{ \AA}^3$ $R_p = 4.56\%$ $R_{wp} = 5.74\%$ |        |        |        |        |

**Table S3.** Comparison of the electrochemical performance of  $\text{Na}_{0.67-x}\text{Ca}_x\text{Ni}_{0.33}\text{Mn}_{0.67}\text{O}_{2-2x}\text{F}_{2x}$  and other P2-Na-Ni-Mn-O type materials.

| Material                                                                                                      | Voltage window   | Capacity retention                       | Reference        |
|---------------------------------------------------------------------------------------------------------------|------------------|------------------------------------------|------------------|
| $\text{Na}_{2/3}\text{Cu}_{1/6}\text{Ni}_{1/6}\text{Mn}_{2/3}\text{O}_2$                                      | 2.5-4.4 V        | 97.0%, 30 cycles, 1C                     | 1                |
| $\text{Na}_{2/3}\text{Ni}_{1/4}\text{Mn}_{2/3}\text{Cu}_{1/12}\text{O}_2$                                     | 2.0-4.5 V        | 89.0%, 50 cycles, 0.05C                  | 2                |
| $\text{Na}_{0.67}\text{Ni}_{0.25}\text{Mg}_{0.05}\text{Mn}_{0.7}\text{O}_2$                                   | 2.0-4.5 V        | 91.5%, 50 cycles, 200 mA g <sup>-1</sup> | 3                |
| $\text{Na}_{0.67}\text{Mn}_{0.65}\text{Ni}_{0.2}\text{Co}_{0.15}\text{O}_2$                                   | 2.0-4.3 V        | 62.0%, 100 cycles, 0.1C                  | 4                |
| $\text{Na}_{2/3}\text{Ni}_{1/3}\text{Mn}_{1/3}\text{Ti}_{1/3}\text{O}_2$                                      | 2.5-4.35 V       | 83.9%, 500 cycles, 1C                    | 5                |
| $\text{Al}_2\text{O}_3\text{-Na}_{2/3}[\text{Ni}_{1/3}\text{Mn}_{2/3}]\text{O}_2$                             | 2.5-4.3 V        | 73.2%, 300 cycles, 0.5C                  | 6                |
| $\text{Na}_{0.78}\text{Al}_{0.05}\text{Ni}_{0.33}\text{Mn}_{0.60}\text{O}_2$                                  | 2.0-4.5 V        | 83.9%, 50 cycles, 0.1C                   | 7                |
| $\text{Na}_{0.67}\text{Fe}_{0.20}\text{Ni}_{0.15}\text{Mn}_{0.65}\text{O}_2$                                  | 2.0-3.8 V        | 70.0%, 900 cycles, 1C                    | 8                |
| $\text{Na}_{2/3}[\text{Ni}_{0.3}\text{Co}_{0.1}\text{Mn}_{0.6}]\text{O}_2$                                    | 2.0-4.3 V        | 79.2%, 50 cycles, 0.1C                   | 9                |
| $\text{Na}_{2/3}\text{Ni}_{1/3}\text{Mn}_{7/12}\text{Fe}_{1/12}\text{O}_2$                                    | 2.0-4.4 V        | 85.0%, 300 cycles, 5C                    | 10               |
| <b><math>\text{Na}_{0.67-x}\text{Ca}_x\text{Ni}_{0.33}\text{Mn}_{0.67}\text{O}_{2-2x}\text{F}_{2x}</math></b> | <b>2.0-4.3 V</b> | <b>87.2%, 500 cycles, 1C</b>             | <b>This work</b> |

## References

1. L. Zheng, J. Li and M. N. Obrovac, *Chem. Mater.*, 2017, **29**, 1623-1631.
2. K. Kubota, Y. Yoda and S. Komaba, *J. Electrochem. Soc.*, 2017, **164**, A2368-A2373.
3. G. Singh, N. Tapia-Ruiz, J. M. Lopez del Amo, U. Maitra, J. W. Somerville, A. R. Armstrong, J. Martinez de Ilarduya, T. Rojo and P. G. Bruce, *Chem. Mater.*, 2016, **28**, 5087-5094.
4. Y. Wen, J. Fan, C. Shi, P. Dai, Y. Hong, R. Wang, L. Wu, Z. Zhou, J. Li, L. Huang and S.-G. Sun, *Nano Energy*, 2019, **60**, 162-170.

5. P.-F. Wang, H.-R. Yao, X.-Y. Liu, Y.-X. Yin, J.-N. Zhang, Y. Wen, X. Yu, L. Gu and Y.-G. Guo, *Sci. Adv.*, 2018, **4**, eaar6018.
6. Y. Liu, X. Fang, A. Zhang, C. Shen, Q. Liu, H. A. Enaya and C. Zhou, *Nano Energy*, 2016, **27**, 27-34.
7. Y. Shi, S. Li, A. Gao, J. Zheng, Q. Zhang, X. Lu, L. Gu and D. Cao, *ACS Appl. Mater. Interfaces*, 2019, **11**, 24122-24131.
8. C. Luo, A. Langrock, X. Fan, Y. Liang and C. Wang, *J. Mater. Chem. A*, 2017, **5**, 18214-18220.
9. P. Hou, Y. Sun, F. Li, Y. Sun, X. Deng, H. Zhang, X. Xu and L. Zhang, *Nanoscale*, 2019, **11**, 2787-2794.
10. Q. Yang, P.-F. Wang, J.-Z. Guo, Z.-M. Chen, W.-L. Pang, K.-C. Huang, Y.-G. Guo, X.-L. Wu and J.-P. Zhang, *ACS Appl. Mater. Interfaces*, 2018, **10**, 34272-34282.
